# Supplementary material for: Photosensitization of nanoparticulate TiO2 using a Re(i)-polypyridyl complex: studies on interfacial electron transfer in the ultrafast time domain
Source: Royal Society of Chemistry journal article supplement (doi:10.1039/c2cp24105f), 2012-01-01
Supplement: c2cp24105f.pdf [file c2cp24105f.pdf]

# Supporting Information

## Photosensitization of Nanoparticulate TiO<sub>2</sub> Using Re(I)-polypyridyl Complex: Studies on Interfacial Electron Transfer in Ultrafast Time Domain

Prasenjit Kar<sup>b</sup>, Tanmay Banerjee<sup>b</sup>, Sandeep Verma<sup>a</sup>, Anik Sen,<sup>b</sup> Amitava Das,<sup>b,\*</sup>  
Bishwajit Ganguly<sup>b,\*</sup> and Hirendra N. Ghosh<sup>a,\*</sup>

<sup>a</sup> Radiation and Photo Chemistry Division, Bhabha Atomic Research Center, Mumbai, India.

<sup>b</sup> Central Salt and Marine Chemicals Research Institute (CSIR), Bhavnagar: 364002, Gujarat, India.

### 1. FT-IR spectrum of **1**

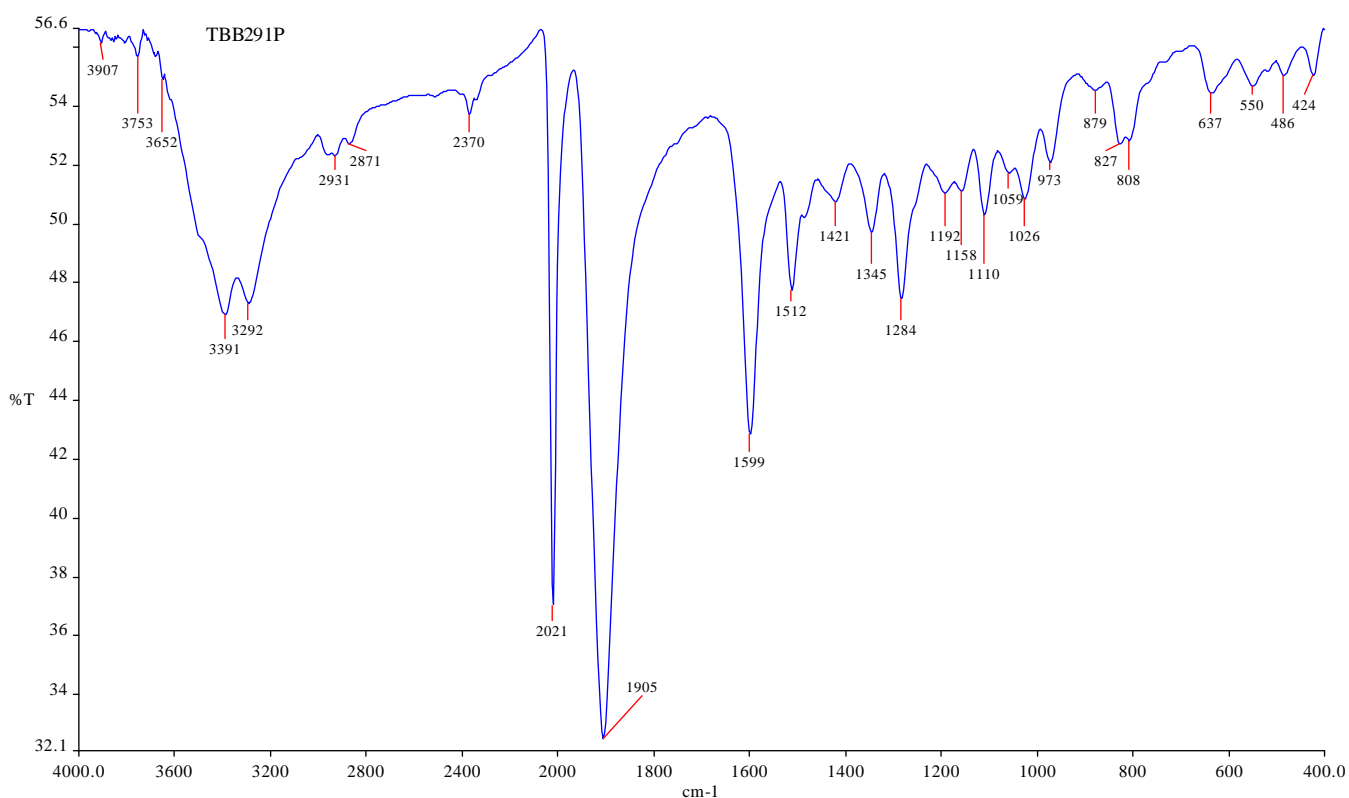

Figure S1: FT-IR spectrum of **1**.

\* Correspondence should be addressed to HNG: [hngghosh@barc.gov.in](mailto:hngghosh@barc.gov.in), and AD: [amitava@csmcri.org](mailto:amitava@csmcri.org), BG: [ganguly@csmcri.org](mailto:ganguly@csmcri.org)

## 2. Mass Spectrum of 1

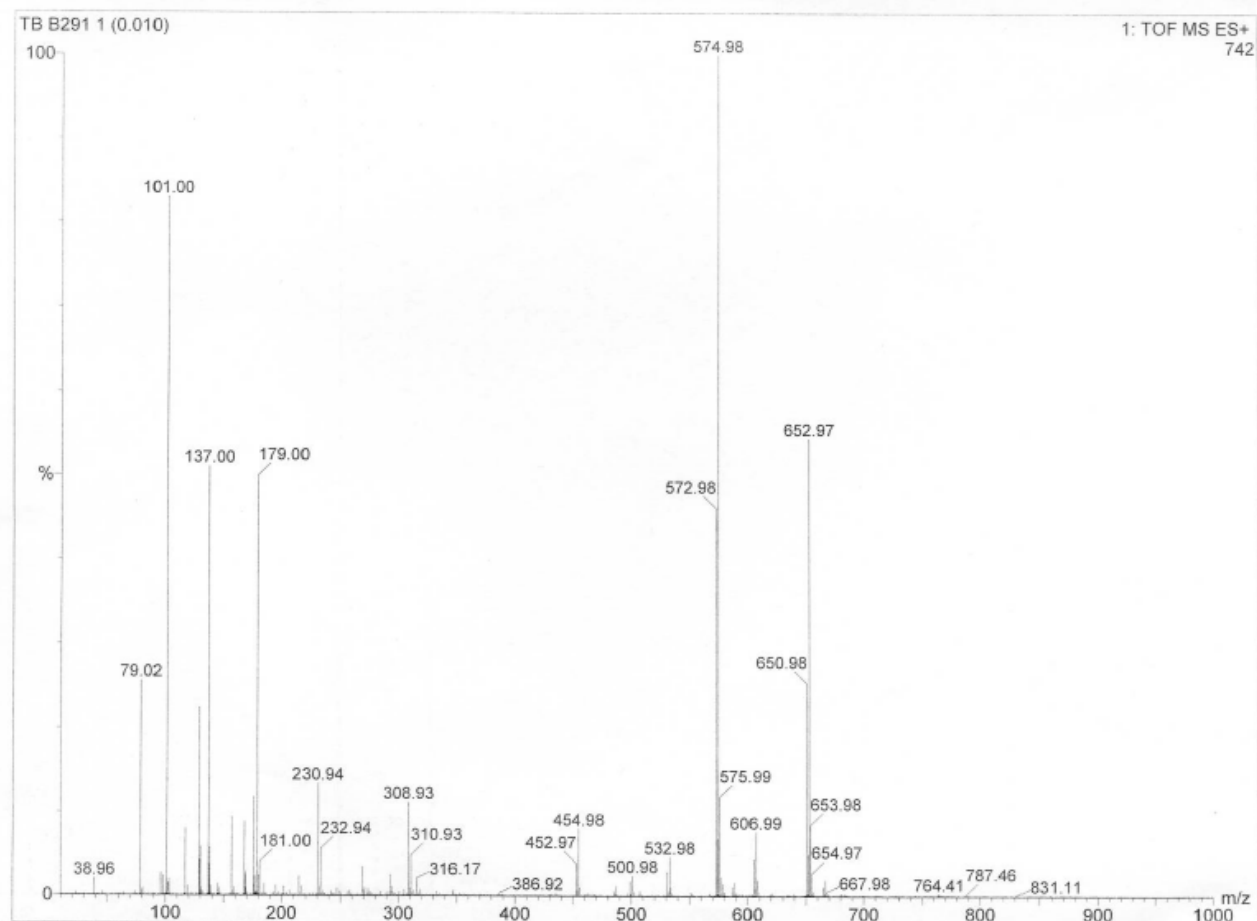

Figure S2: ESI-MS Spectrum of 2.

### 3. $^1\text{H}$ NMR spectrum of **1**

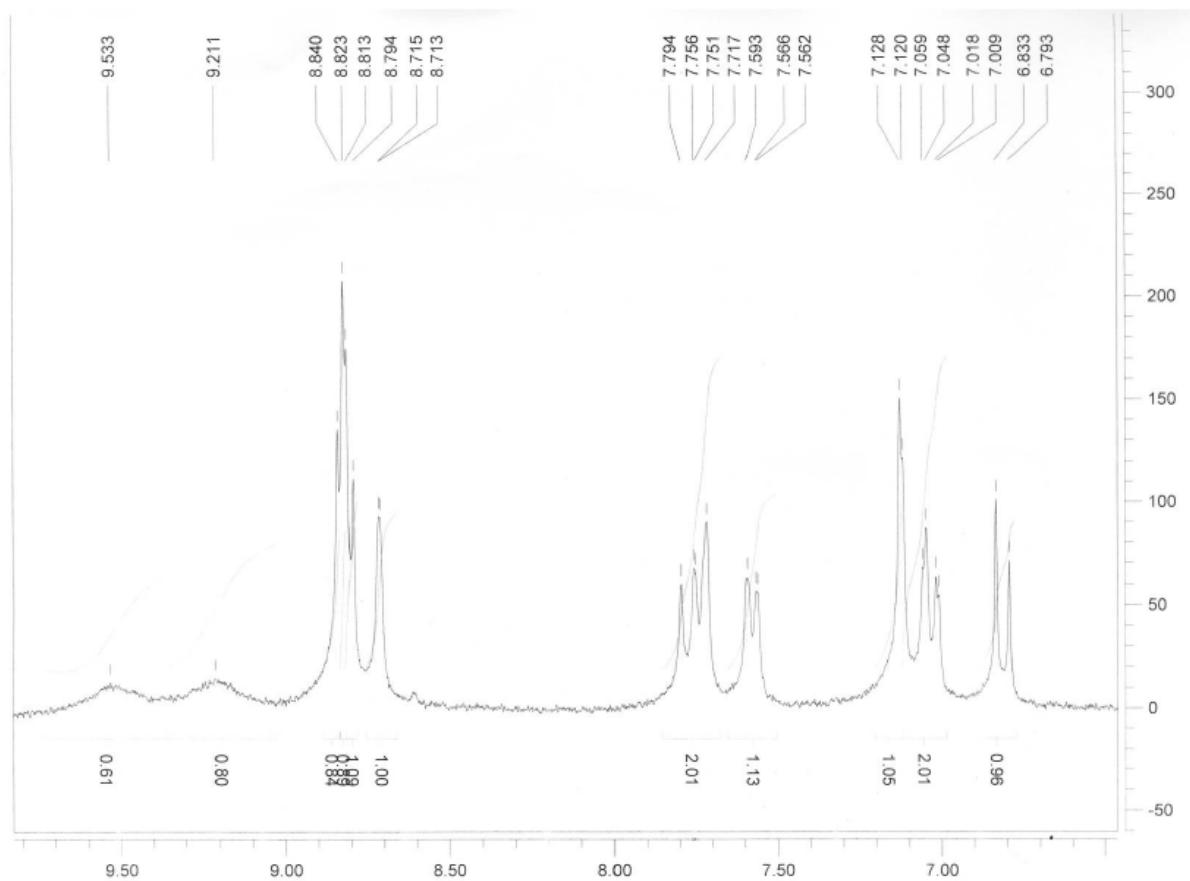

Figure S3: Partial 200 MHz  $^1\text{H}$  NMR spectrum of **1** in  $d_6$ - $dmsO$ .
